# Supplementary material for: Polyelectrolyte-derived adhesive, super-stretchable hydrogel for a stable, wireless wearable sensor
Source: Royal Society of Chemistry journal article supplement (doi:10.1039/d1tc04258k), 2021-01-01
Supplement: d1tc04258k1.pdf [file d1tc04258k1.pdf]

## Supplementary material

### **Polyelectrolyte-derived adhesive, super-stretchable hydrogel for a stable, wireless wearable sensor**

*Sohyeon Heo<sup>1,2</sup>, Hyunsu Seo<sup>1</sup>, Changsik Song<sup>2</sup>, Seunghan Shin<sup>1,3</sup>, Kiok Kwon<sup>1\*</sup>*

<sup>1</sup>Green Chemistry & Materials Group, Korea Institute of Industrial Technology (KITECH), Cheonan, Chungnam 31056, Republic of Korea

<sup>2</sup>Department of Chemistry, Sungkyunkwan University (SKKU), Suwon Gyeonggi 16419, Republic of Korea

<sup>3</sup>Department of Green Process and System Engineering, Korea University of Science & Technology (UST), Cheonan, Chungnam 31056, Republic of Korea

\*Correspondence to Kiok Kwon: [kioks@kitech.re.kr](mailto:kioks@kitech.re.kr)

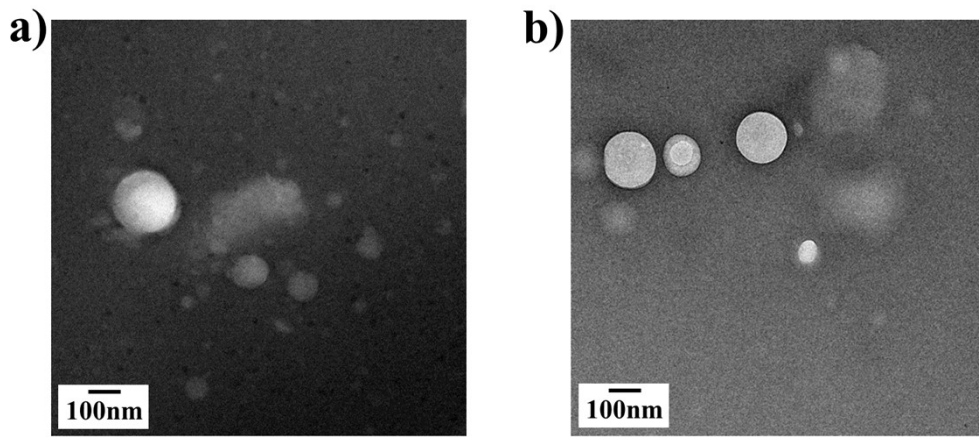

**Fig. S1.** TEM images of SC micelle. (a) SC micelles solution in DI water, (b) SC micelles solution in precursor solution.

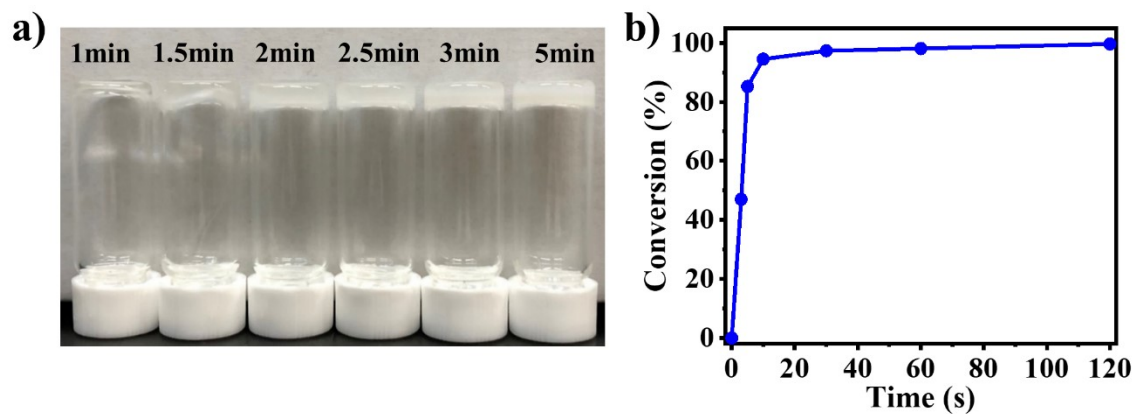

**Fig. S2.** (a) Photo image of P(AMPSs-co-AAm)/SC hydrogel for different UV curing times 1min, 1.5min, 2min, 2.5min, 3min and 5min, respectively. (b) UV conversion graph of P(AMPSs-co-AAm)/SC hydrogel for different UV curing times 3min, 5min, 10min, 30min, 60min and 120min, respectively.

| Hydrogels                 | AMPS<br>(g) | AAm<br>(g) | SC<br>(g) | MBAA<br>(mL) | Irgacure2959<br>(g) | H <sub>2</sub> O<br>(mL) | Water content<br>(%) |
|---------------------------|-------------|------------|-----------|--------------|---------------------|--------------------------|----------------------|
| <b>P(AMPSs-co-AAm)</b>    | 2           | 2          | 0         | 0.06         | 0.03                | 7                        | 72.9                 |
| <b>P(AMPSs-co-AAm)-SC</b> | 2           | 2          | 0.6       | 0.072        | 0.036               | 8.5                      | 72.7                 |
| <b>0wt%-SC</b>            | 2           | 2          | 0         | 0.06         | 0.03                | 7                        | 72.9                 |
| <b>10wt%-SC</b>           | 2           | 2          | 0.3       | 0.066        | 0.033               | 7.5                      | 72.3                 |
| <b>20wt%-SC</b>           | 2           | 2          | 0.6       | 0.072        | 0.036               | 8.5                      | 72.7                 |
| <b>30wt%-SC</b>           | 2           | 2          | 0.9       | 0.078        | 0.039               | 9                        | 72.2                 |
| <b>AMPSs/AAm=3:1</b>      | 3           | 0.5        | 0         | 0.04         | 0.02                | 4                        | 73.5                 |
| <b>AMPSs/AAm=1:1</b>      | 3           | 1.5        | 0         | 0.06         | 0.03                | 6.5                      | 72.9                 |
| <b>AMPSs/AAm=1:2</b>      | 2           | 2          | 0         | 0.06         | 0.03                | 7                        | 72.9                 |
| <b>AMPSs/AAm=1:3</b>      | 2           | 3          | 0         | 0.08         | 0.04                | 9.5                      | 72.6                 |

**Table. S1.** Composition ratio according to P(AMPSs-co-AAm)/SC hydrogel components.
